# Supplementary material for: Free and Poly-Methyl-Methacrylate-Bounded BODIPYs: Photodynamic and Antimigratory Effects in 2D and 3D Cancer Models
Source: MDPI journal article supplement (doi:10.3390/cancers15010092), 2022-12-23
Supplement: s1 [file s1]

# Free and Poly-Methyl-Methacrylate-Bounded BODIPYs: Photodynamic and Antimigratory Effects in 2D and 3D Cancer Models

Marco Ballestri, Emanuela Marras, Enrico Caruso, Fabrizio Bolognese, Miryam Chiara Malacarne, Elisa Martella, Matilde Tubertini, Marzia Bruna Gariboldi \* and Greta Varchi \*

## Supporting Information

### Table of Content

|                                                                                                                                                                                                                                                                                                                                                                                                                                                                                               |   |
|-----------------------------------------------------------------------------------------------------------------------------------------------------------------------------------------------------------------------------------------------------------------------------------------------------------------------------------------------------------------------------------------------------------------------------------------------------------------------------------------------|---|
| <b>Figure S1.</b> A) Chemical synthesis of compounds <b>3f</b> and <b>6f</b> starting from derivatives <b>1a</b> and <b>1b</b> . B) Absorbance and emission spectra of compound <b>3f</b> and <b>6f</b> .                                                                                                                                                                                                                                                                                     | 2 |
| <b>Figure S2.</b> <sup>1</sup> HNMR of compound <b>3f</b> , (400 MHz, DMSO-d <sub>6</sub> ).                                                                                                                                                                                                                                                                                                                                                                                                  | 2 |
| <b>Figure S3.</b> <sup>13</sup> CNMR of compound <b>3f</b> , (100 MHz, DMSO-d <sub>6</sub> ).                                                                                                                                                                                                                                                                                                                                                                                                 | 3 |
| <b>Figure S4.</b> <sup>1</sup> HNMR of compound <b>6f</b> , (400 MHz, DMSO-d <sub>6</sub> ).                                                                                                                                                                                                                                                                                                                                                                                                  | 3 |
| <b>Figure S5.</b> <sup>13</sup> CNMR of compound <b>6f</b> , (100 MHz, DMSO-d <sub>6</sub> ).                                                                                                                                                                                                                                                                                                                                                                                                 | 4 |
| <b>Figure S6.</b> Graph showing the baseline profile of the dichlorofluorescein (DCF) at different irradiation times.                                                                                                                                                                                                                                                                                                                                                                         | 4 |
| <b>Figure S7.</b> Graphs showing the ROS production of <b>3</b> and <b>6</b> displayed as absorption spectra of DCF measured at different irradiation times (minutes).                                                                                                                                                                                                                                                                                                                        | 5 |
| <b>Figure S8.</b> Effect of 24h treatment with <b>3</b> , <b>3@nPMMA</b> , <b>6</b> , and <b>6@nPMMA</b> and nPMMA, 1h irradiation and incubation for 24 h in drug free medium at 37 °C on the migratory activity of SKOV3 cells. Scratch wounds were produced before the irradiation step and pictures were taken immediately after it (0) and after 24 h, through a camera connected to an Olympus IX81 microscope. Picture showed are representative of three independent experiments.     | 5 |
| <b>Figure S9.</b> Effect of 24h treatment with <b>3</b> , <b>3@nPMMA</b> , <b>6</b> , and <b>6@nPMMA</b> and nPMMA, 1h irradiation and incubation for 24 h in drug free medium at 37 °C on the migratory activity of MDA-MB231 cells. Scratch wounds were produced before the irradiation step and pictures were taken immediately after it (0) and after 24 h, through a camera connected to an Olympus IX81 microscope. Picture showed are representative of three independent experiments. | 6 |
| <b>Figure S10.</b> ROS levels in HCT116, SKOV3, MCF7 and MDA-MB231 cells following 24h treatment with free (green) or nPMMA-bounded (red) <b>3</b> and <b>6</b> and 1h irradiation. Fluorescence intensity was quantitated based on the Median Fluorescence Intensity (MFI) and results obtained in 3 independent experiments are reported in the graph (*p<0.05, **p<0.01 vs respective free-BODIPY).                                                                                        | 7 |

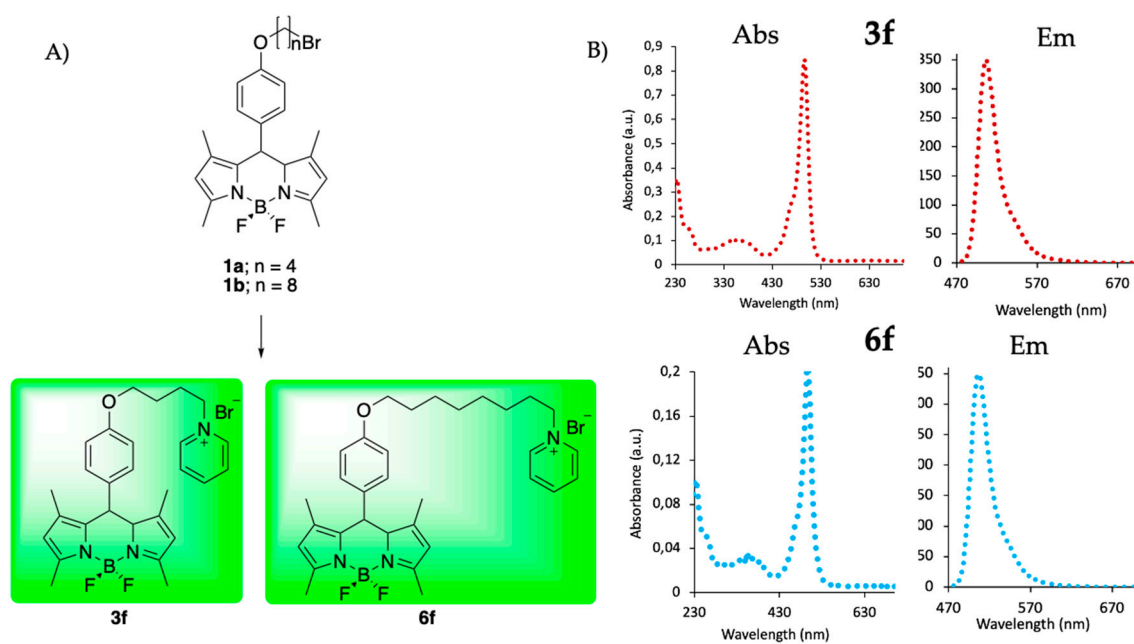

Figure S1. A) Chemical synthesis of compounds **3f** and **6f** starting from derivatives **1a** and **1b**. B) Absorbance and emission spectra of compound **3f** and **6f**.

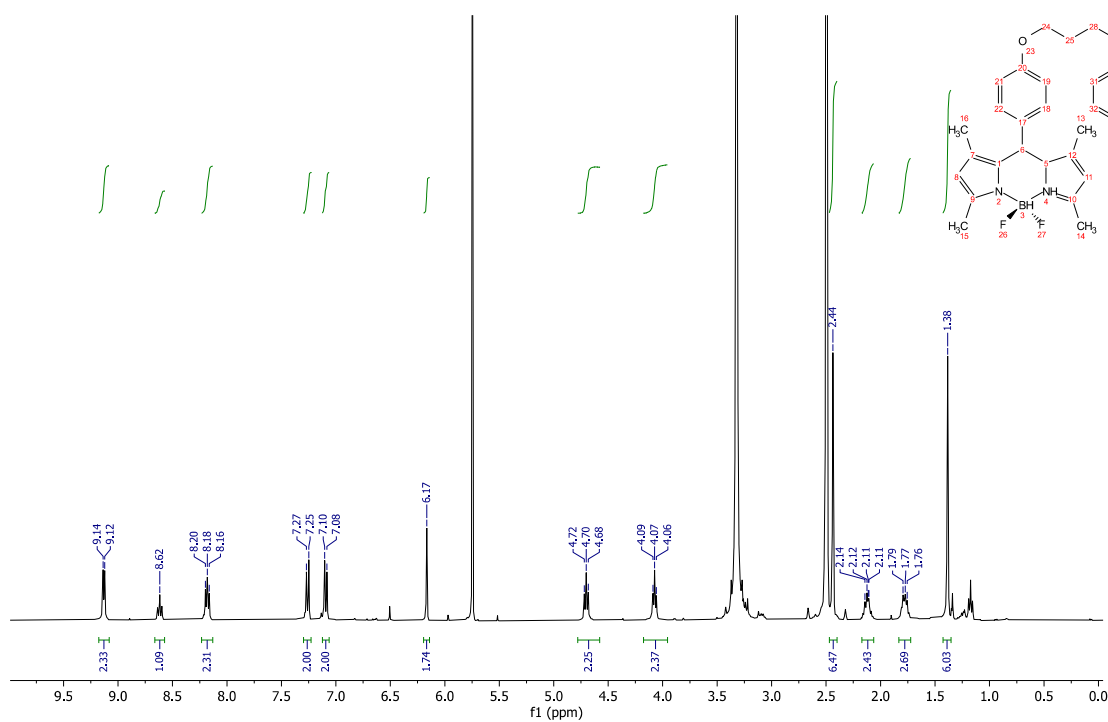

Figure S2. <sup>1</sup>HNMR of compound **3f**, (400 MHz, DMSO-d<sub>6</sub>).

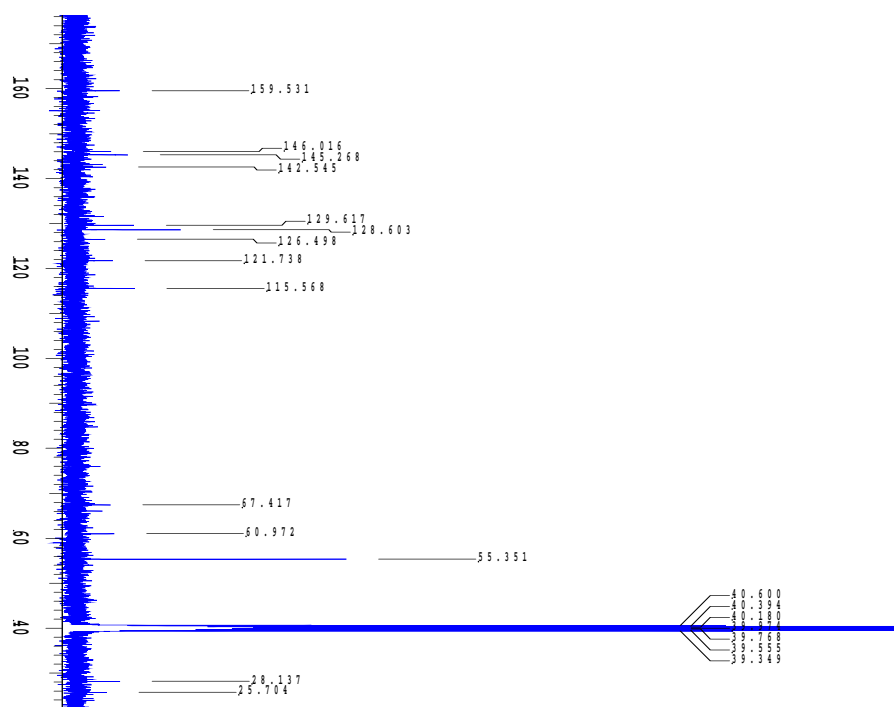

Figure S3.  $^{13}\text{C}$ NMR of compound 3f, (100 MHz,  $\text{DMSO-d}_6$ ).

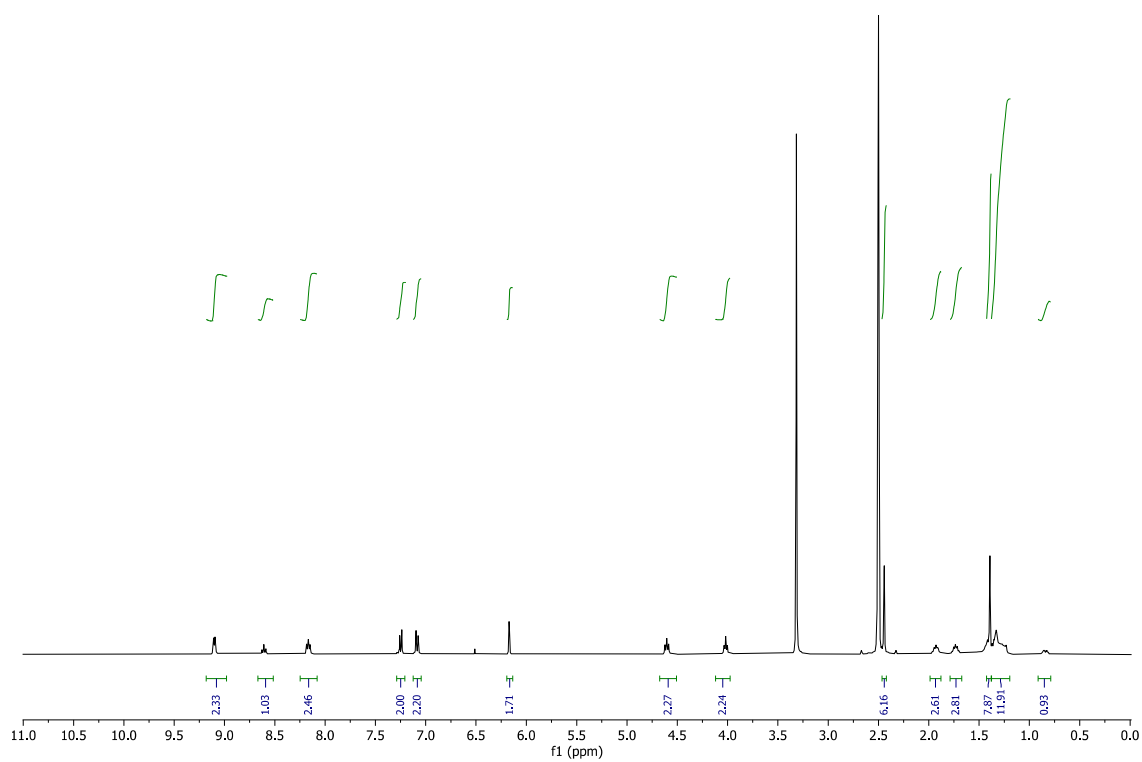

Figure S4.  $^1\text{H}$ NMR of compound 6f, (400 MHz,  $\text{DMSO-d}_6$ ).

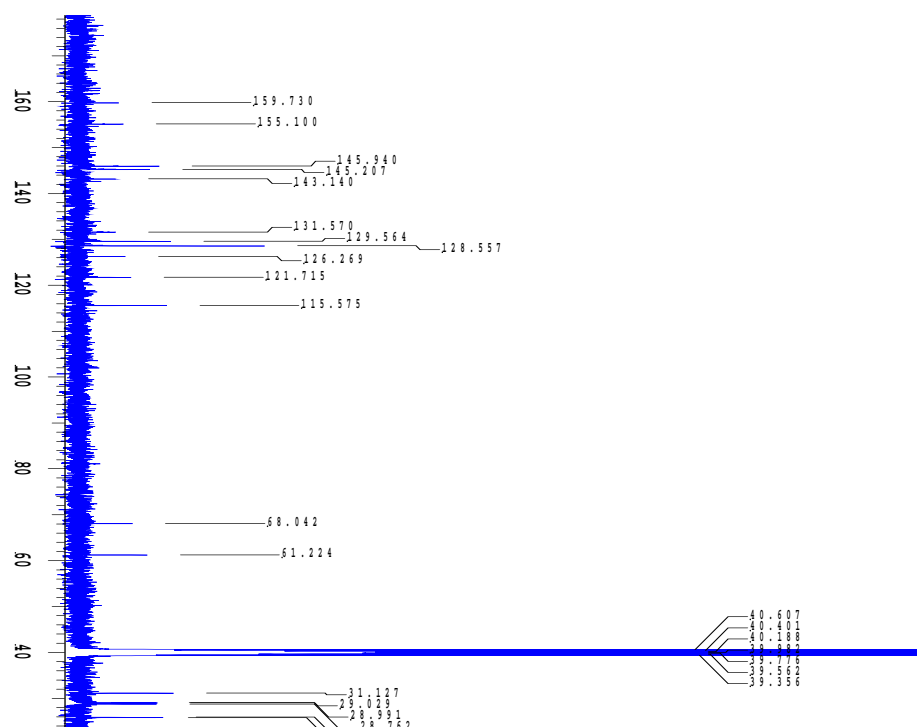

Figure S5.  $^{13}\text{C}$ NMR of compound **6f**, (100 MHz,  $\text{DMSO-d}_6$ )

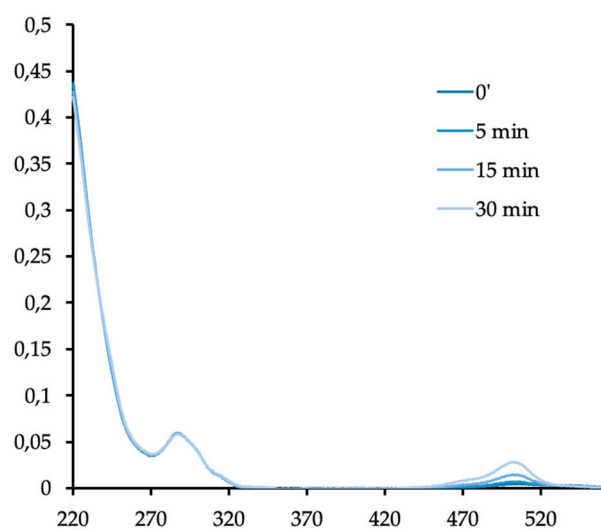

Figure S6. Graph showing the baseline profile of the dichlorofluorescein (DCF) at different irradiation times.

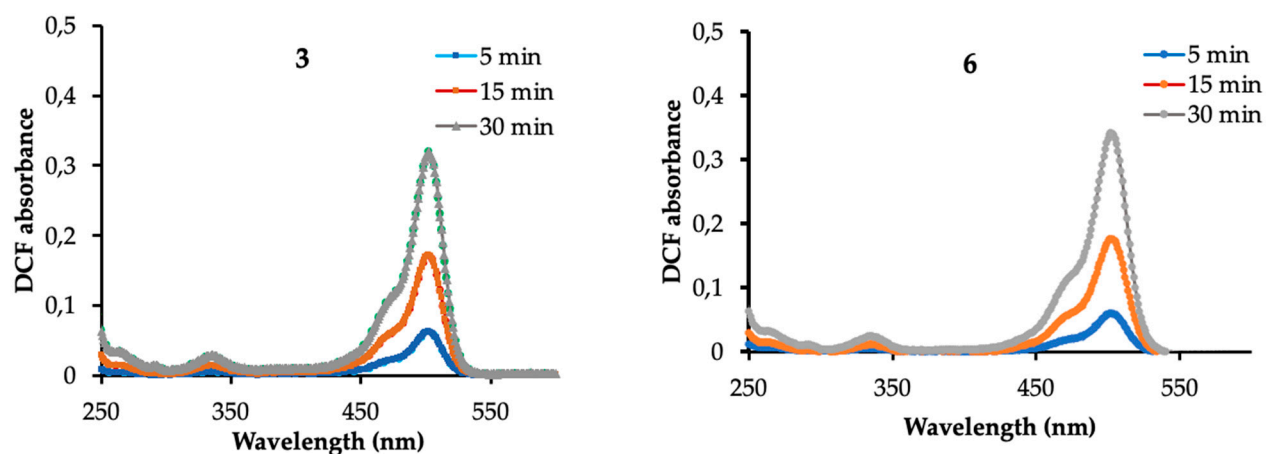

Figure S7. Graphs showing the ROS production of 3 and 6 displayed as absorption spectra of DCF measured at different irradiation times (minutes).

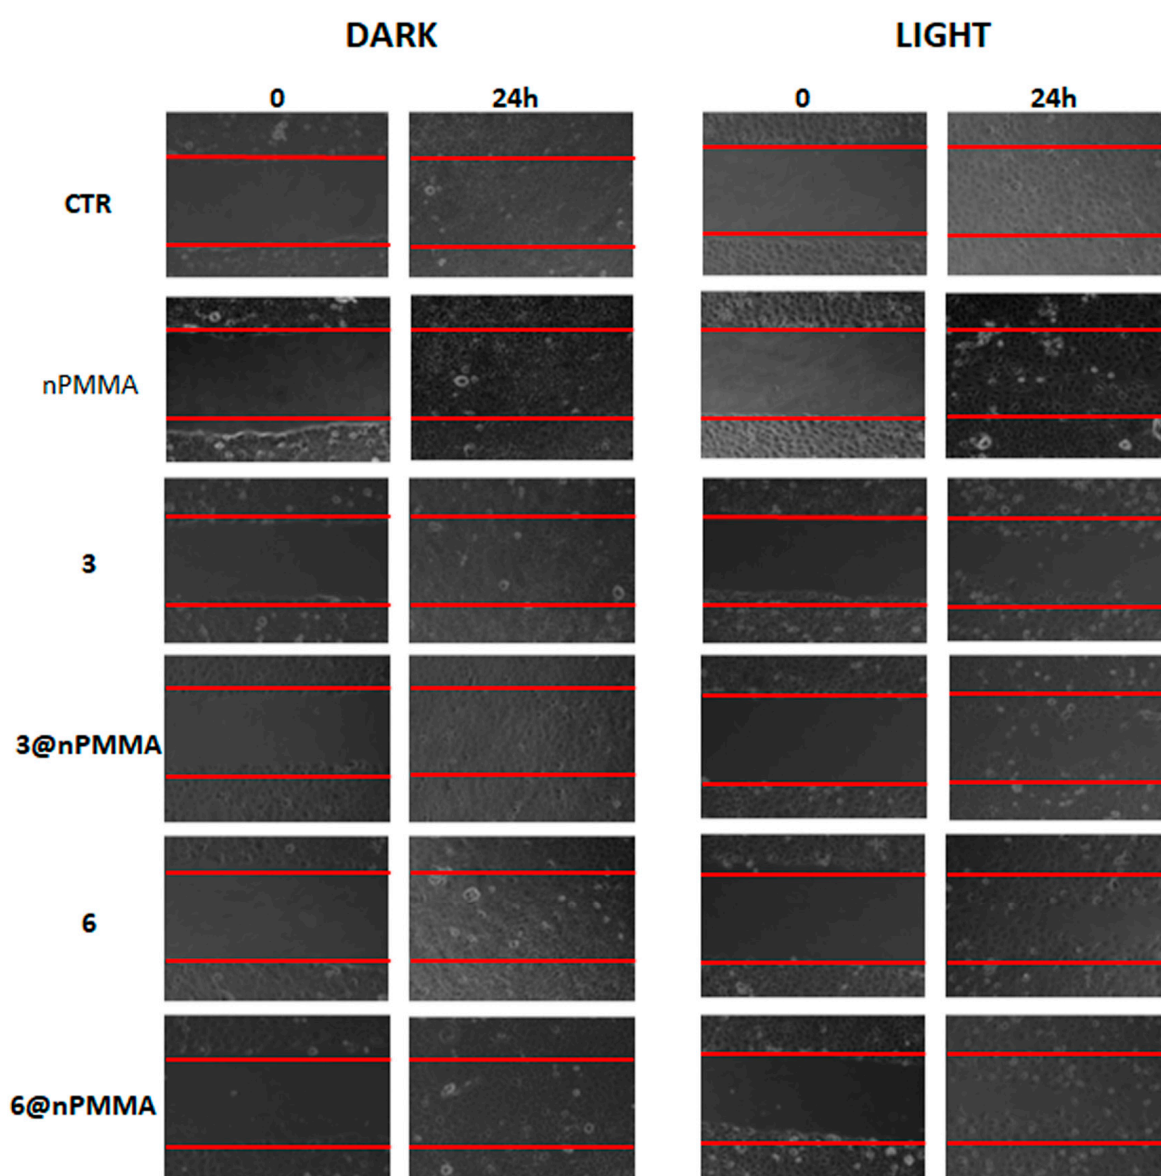

Figure S8. Effect of 24h treatment with 3, 3@nPMMA, 6, and 6@nPMMA and nPMMA, 1h irradiation and incubation for 24 h in drug free medium at 37 °C on the migratory activity of SKOV3 cells. Scratch wounds were produced before the irradiation step and pictures were taken immediately after it (0) and after 24 h, through a camera connected to an Olympus IX81 microscope. Picture showed are representative of three independent experiments.

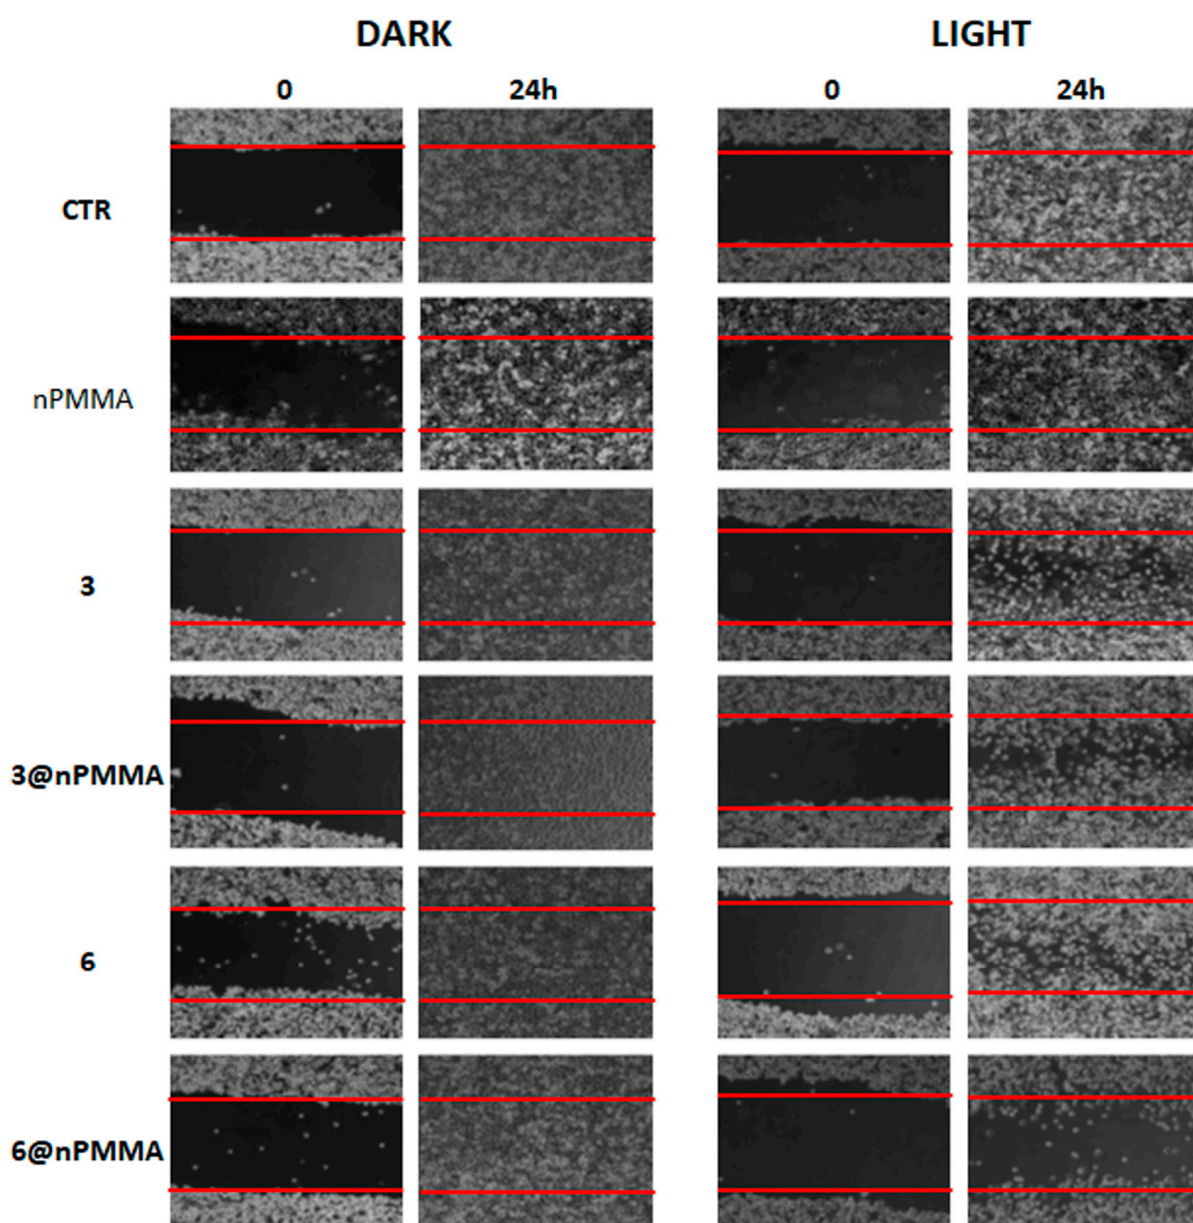

*Figure S9. Effect of 24h treatment with 3, 3@nPMMA, 6, and 6@nPMMA and nPMMA, 1h irradiation and incubation for 24 h in drug free medium at 37 °C on the migratory activity of MDA-MB231 cells. Scratch wounds were produced before the irradiation step and pictures were taken immediately after it (0) and after 24 h, through a camera connected to an Olympus IX81 microscope. Picture showed are representative of three independent experiments.*

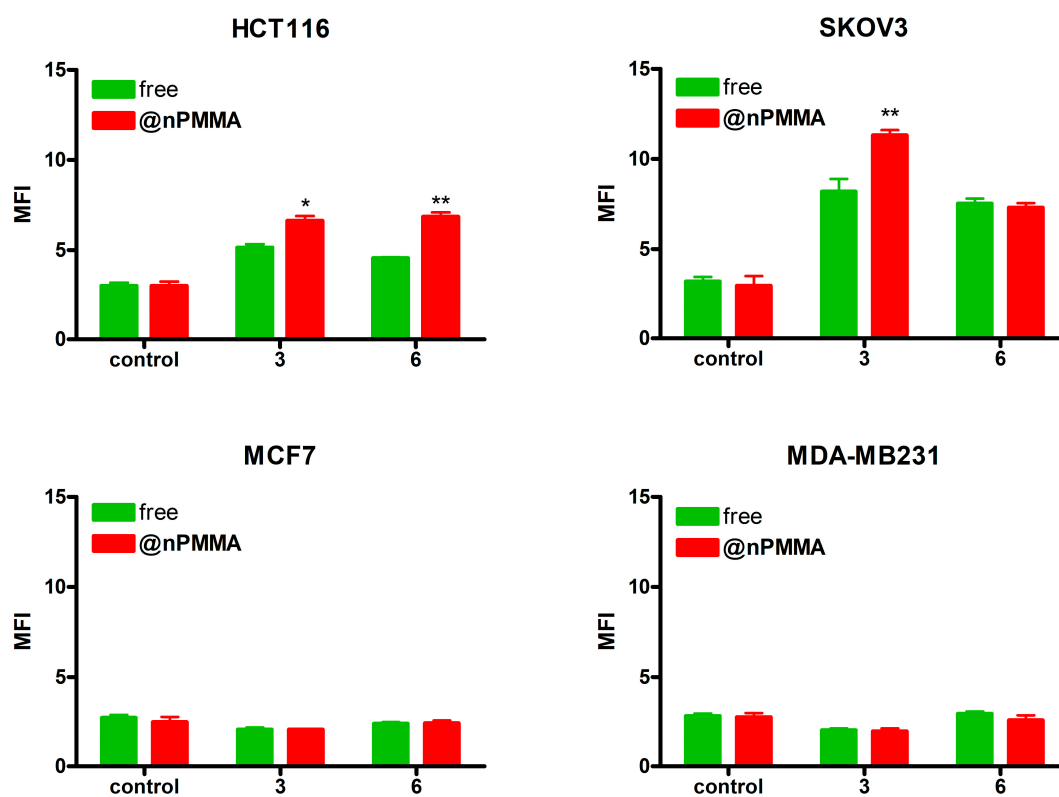

*Figure S10. ROS levels in HCT116, SKOV3, MCF7 and MDA-MB231 cells following 24h treatment with free (green) or nPMMA-bounded (red) 3 and 6 and 1h irradiation. Fluorescence intensity was quantitated based on the Median Fluorescence Intensity (MFI) and results obtained in 3 independent experiments are reported in the graph (\* $p < 0.05$ , \*\* $p < 0.01$  vs respective free-BODIPY).*
